# Supplementary material for: Economic impact of dengue in Singapore from 2010 to 2020 and the cost-effectiveness of Wolbachia interventions
Source: PubMed Central journal article supplement (PMC10021432; doi:10.1371/journal.pgph.0000024), 2021-10-13
Supplement: pgph.0000024.s001.pdf [file pgph.0000024.s001.pdf]

# S1 Appendix

July 21, 2021

## 1 Sensitivity analysis of parameters (Economic Costs)

| 25% increase in parameter                   | Constant symptomatic rates |               | Age dependent symptomatic rates |               |
|---------------------------------------------|----------------------------|---------------|---------------------------------|---------------|
|                                             | Human capital              | Friction cost | Human capital                   | Friction cost |
| Death discount rate                         | 1.032                      | 0.459         | 1.016                           | 2.254         |
| Ambulatory expansion factor (Constant)      | 1.425                      | 0.742         | 1.000                           | 1.000         |
| Ambulatory expansion factor (Age-dependent) | 1.000                      | 1.000         | 2.666                           | 1.245         |
| Hospital expansion factor                   | 0.656                      | 0.410         | 3.045                           | 1.960         |
| Elasticity of labour product                | 0.482                      | 1.025         | 2.177                           | 1.009         |
| Transport cost                              | 0.638                      | 0.346         | 3.007                           | 1.633         |
| Household service lost                      | 1.033                      | 0.460         | 1.016                           | 2.259         |
| Proportion of elderly requiring caregiving  | 1.429                      | 0.744         | 1.348                           | 0.765         |
| Proportion of children requiring caregiving | 0.483                      | 1.061         | 2.184                           | 1.026         |
| Days absent from ambulatory visit           | 1.217                      | 0.545         | 1.223                           | 2.719         |
| Number of ambulatory visits                 | 1.706                      | 0.900         | 1.649                           | 0.939         |

Table 1: Numbers represent the proportion increase in economic cost estimates for dengue from 2010 to 2020 from baseline levels given a 25% increase in the value of the respective parameter.

## 2 Sensitivity analysis of parameters (Health burdens)

| 25% increase in parameter              | Age Disability Weight |             | Disease Disability Weight |             |
|----------------------------------------|-----------------------|-------------|---------------------------|-------------|
|                                        | Age Dependent EF      | Constant EF | Age Dependent EF          | Constant EF |
| $D_{\text{child}}$                     | 1.009                 | 1.977       | 1.387                     | 2.760       |
| $D_{\text{adult}}$                     | 0.635                 | 1.249       | 0.716                     | 1.416       |
| $D_{\text{df}}$                        | 0.724                 | 1.422       | 1.001                     | 1.993       |
| $D_{\text{dhf}}$                       | 0.364                 | 0.714       | 0.619                     | 1.241       |
| $r$                                    | 0.967                 | 1.900       | 1.336                     | 2.661       |
| $C$                                    | 0.638                 | 1.253       | 0.882                     | 1.755       |
| $\beta$                                | 0.474                 | 0.896       | 0.654                     | 1.254       |
| Duration of disability (Reported DF)   | 0.430                 | 0.843       | 0.595                     | 1.181       |
| Duration of disability (Unreported DF) | 1.002                 | 1.969       | 1.385                     | 2.758       |
| Duration of disability (DHF)           | 0.511                 | 1.003       | 0.705                     | 1.405       |
| Proportion DHF                         | 0.724                 | 1.422       | 1.000                     | 1.992       |
| Proportion hospitalized                | 0.364                 | 0.714       | 0.502                     | 1.000       |
| Expansion factor (Constant)            | 1.000                 | 1.969       | 1.000                     | 2.758       |
| Expansion factor (Age-dependent)       | 0.510                 | 1.000       | 0.705                     | 1.000       |
| Expansion factor (Hospitalization)     | 0.372                 | 0.723       | 0.511                     | 1.009       |
| Symptomatic rate                       | 0.724                 | 1.422       | 1.000                     | 1.992       |

Table 2: Numbers represent the proportion increase in health cost estimates for dengue from 2010 to 2020 from baseline levels given a 25% increase in the value of the respective parameter. EF denotes expansion factor
